# Supplementary material for: Osteogenic Embryoid Body-Derived Material Induces Bone Formation In Vivo
Source: PubMed Central journal article supplement (PMC4426716; doi:10.1038/srep09960), 2015-05-11
Supplement: srep09960-s1.pdf [file srep09960-s1.pdf]

## **Osteogenic Embryoid Body-Derived Material Induces Bone Formation *In Vivo***

Ken Sutha<sup>1</sup>, Zvi Schwartz<sup>2</sup>, Yun Wang<sup>1</sup>, Sharon Hyzy<sup>2</sup>,

Barbara D. Boyan<sup>1,2</sup>, Todd C. McDevitt<sup>1,3\*</sup>

<sup>1</sup>Wallace H. Coulter Department of Biomedical Engineering, Georgia Institute of Technology & Emory University, 313 Ferst Drive, Atlanta GA, 30332-0535, USA

<sup>2</sup>Department of Biomedical Engineering, School of Engineering, Virginia Commonwealth University, Richmond, VA, 23284-3068, USA

<sup>3</sup>Parker H. Petit Institute for Bioengineering and Bioscience, Georgia Institute of Technology, 315 Ferst Drive, Atlanta GA, 30332-0532, USA

**\*Corresponding Author: Todd C. McDevitt, Ph.D.**

315 Ferst Drive

Atlanta GA, 30332-0532

Phone: 404.385.6647

Fax: 404.894.4243

Email: [todd.mcdevitt@bme.gatech.edu](mailto:todd.mcdevitt@bme.gatech.edu)

**Supplementary Table**

**Supplementary Table 1. Osteoinduction Scoring**

| <b>Osteoinduction Score</b> | <b>Observation Within Entire Limb Section</b> |
|-----------------------------|-----------------------------------------------|
| 0                           | No residual DBM or EBM                        |
| 1                           | Residual DBM or EBM but no new bone formation |
| 2                           | One single ossicle                            |
| 3                           | Ossicle formation at multiple sites           |

## Supplementary figures

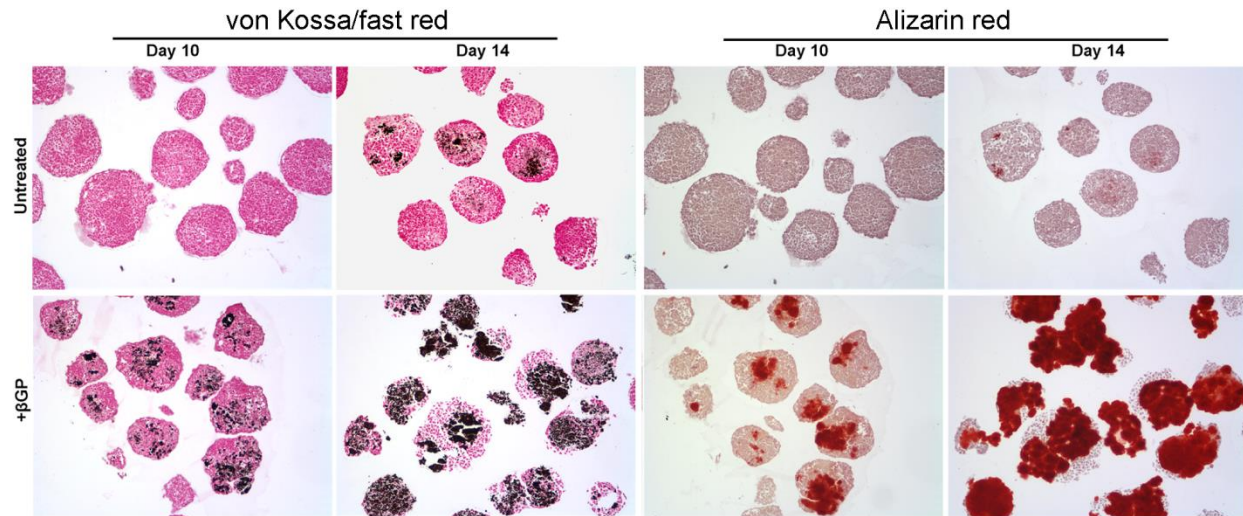

**Supplementary Fig. S1 Mineralization in EBs cultured under different conditions.** EBs differentiated in the absence or presence of  $\beta$ GP (10  $\mu$ M) beginning at day 5 of EB differentiation. **The mineralization of EBs was evaluated using both** von Kossa and Alizarin Red staining (scale bar = 400  $\mu$ m).

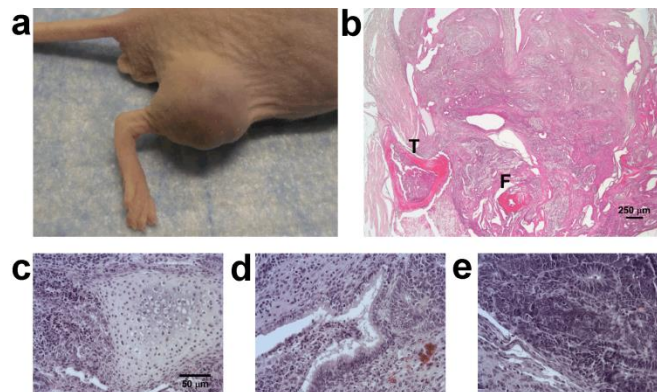

**Supplementary Fig. S2 Teratoma formation 28 days post-implantation of viable day 10 EBs.** Viable day 10 EBs, with and without  $\beta$ GP treatment, were implanted into mouse hindlimbs. Large masses in the hindlimbs were apparent by 28 days post-implantation (a), and when evaluated histologically, the masses were confirmed to be teratomas (b) (T: Tibia, F: Fibula,

scale bar = 250  $\mu\text{m}$ ), which comprised of cells from all three germ lineages: mesoderm (c), endoderm (d), and ectoderm (e), scale bar = 50  $\mu\text{m}$ .

## **Supplementary methods**

### **Histology analysis of mineralization in ESC aggregates**

Paraffin-embedded ESC aggregates were sectioned at a thickness of 5  $\mu\text{m}$  and subjected to routine von Kossa/fast red and alizarin red staining to visualize mineralization within aggregates. Stained sections were imaged using a Nikon Eclipse 80i equipped with a SpotFlex digital camera (Diagnostic Instruments, Sterling Heights, MI).

### **Teratoma formation assay**

All studies were performed with a Georgia Institute of Technology Institutional Animal Care and Use Committee approved protocol. Male SCID mice (8-week-old) were used for all experiments. D10 ESC aggregates were harvested after *in vitro* culture and resuspended in saline and injected into the hindlimbs of the mice. After 28 days of implantation, the tissues were harvested for histological analysis. Paraffin-embedded teratoma tissues were sectioned at a thickness of 5  $\mu\text{m}$  and subjected to routine hematoxylin and eosin staining to examine the tissue formation.
